1 **Extracting the phylogenetic dimension of coevolution reveals hidden**

2 **functional signal**

3

4 Alexandre Colavin<sup>1,\*</sup>, Esha Atolia<sup>2,\*</sup>, Anne-Florence Bitbol<sup>3,4</sup>, Kerwyn Casey Huang<sup>5,6,7,+</sup>

5

6 <sup>1</sup>Biophysics Program, Stanford University School of Medicine, Stanford, CA 94305, USA

7 <sup>2</sup>Department of Chemical and Systems Biology, Stanford University School of Medicine,

8 Stanford, CA 94305, USA

9 <sup>3</sup>Sorbonne Université, CNRS, Institut de Biologie Paris-Seine, Laboratoire Jean Perrin

10 (UMR 8237), F-75005, Paris, France

11 <sup>4</sup>Institute of Bioengineering, School of Life Sciences, Ecole Polytechnique Fédérale de

12 Lausanne (EPFL), CH-1015 Lausanne, Switzerland

13 <sup>5</sup>Department of Bioengineering, Stanford University, Stanford, CA 94305, USA

14 <sup>6</sup>Department of Microbiology and Immunology, Stanford University School of Medicine,

15 Stanford, CA 94305, USA

16 <sup>7</sup>Chan Zuckerberg Biohub, San Francisco, CA 94158

17

18 \*: Co-first authors.

19 *Keywords:* MirrorTree, protein sectors, normalized joint entropy, Direct Information,

20 Average Product Correction, entropy, MreB, H-Ras, ArgS, G6PD, Enolase, MAPK1,

21 Nested Coevolution

22

23 †To whom correspondence should be addressed: [kchuang@stanford.edu](mailto:kchuang@stanford.edu)

24 **Abstract**

25

26 Despite the structural and functional information contained in the statistical coupling  
27 between pairs of residues in a protein, coevolution associated with function is often  
28 obscured by artifactual signals such as genetic drift, which shapes a protein's  
29 phylogenetic history and gives rise to concurrent variation between protein sequences  
30 that is not driven by selection for function. Here, we introduce a method for explicitly  
31 defining a phylogenetic dimension of coevolution signal, and demonstrate that  
32 coevolution can occur on multiple phylogenetic timescales within a single protein. Our  
33 method, Nested Coevolution (NC), can be applied as an extension to any coevolution  
34 metric. We use NC to demonstrate that poorly conserved residues can nonetheless have  
35 important roles in protein function. Moreover, NC improved structural-contact  
36 prediction over gold-standard coevolution-based methods, particularly in subsampled  
37 alignments with fewer sequences. NC also lowered the noise in detecting functional  
38 sectors of collectively coevolving residues. Sectors of coevolving residues identified after  
39 NC correction were more spatially compact and phylogenetically distinct from the rest  
40 of the protein, and strongly enriched for mutations that disrupt protein activity. Our  
41 conceptualization of the phylogenetic separation of coevolution represents an advance  
42 from previous pragmatic attempts to reduce phylogenetic artifacts in measurements of  
43 coevolution. Application of NC broadens the application of protein coevolution

44 measurements, particularly to eukaryotic proteins with fewer naturally available  
45 sequences, and further elucidates relationships among protein evolution and genetic  
46 diseases.

## 47 **Introduction**

48 It has long been appreciated that comparisons among homologous sequences of a protein  
49 of interest can provide key information about its function and structure. Just as  
50 evolutionarily conserved individual residues are generally crucial to a protein's proper  
51 function, the statistical covariation (arising from correlated evolution, i.e. coevolution)  
52 between pairs of residues (1, 2) carries information that is useful for predicting structural  
53 contacts (3-7) and protein-protein interactions (8-11) and their interfaces (12), intuiting  
54 novel protein conformations (5), understanding protein allostery (13), interpreting  
55 variants (14), identifying functional domains (15-18), and reprogramming protein  
56 specificity (19). However, despite the increasing prevalence of sequencing data, sampling  
57 of the phylogenetic tree is necessarily limited and biased. Evolutionary events such as  
58 speciation can drive simultaneous changes that are statistically linked but may not reflect  
59 relevant functional coupling, for example when they arise from genetic drift. Hence,  
60 spurious covariation is more likely to arise in comparisons between distantly related  
61 sequences, hindering the ability of such studies to deliver functional insights.

62

63 Of the numerous existing methods for measuring protein coevolution, many implement  
64 methods for reducing the effects of phylogenetic noise. Although mutual information is  
65 extremely sensitive to the phylogenetic distribution of sequences and the conservation  
66 (measured via entropy) of individual positions, normalization by the joint entropy

67 reduces the influence of phylogeny and entropy and improves structural-contact  
68 prediction (20). Statistical coupling analysis, which normalizes the covariance matrix by  
69 a function of the entropy, provides sufficient information to specify a protein fold (21)  
70 and to detect functional domains (6, 18). Direct coupling analysis (DCA) usually involves  
71 down-weighting the coevolutionary signal contributions from over-represented  
72 sequences, and attempts to deconvolve higher-order correlations to identify directly  
73 interacting residue pairs (4, 22). Motivated by the observed strong relationship between  
74 a position's average mutual information and the mutual information it exhibits with  
75 specific positions, modifications such as the average product correction (APC) subtract  
76 this average signal; this correction can be applied to any existing coevolution metric other  
77 than mutual information. However, none of these strategies attempt to resolve the  
78 evolutionary timescale of coevolution.

79  
80 Even with affordable sequencing and widespread environmental sampling, coevolution  
81 methods are often limited by the number of naturally occurring protein sequences  
82 available. Successful predictions of structural contacts often require several thousand  
83 sequences to align (3, 23), which is generally prohibitive for many mammalian proteins.  
84 For other proteins, the phylogenetic distribution of available sequences is skewed by  
85 sampling and is well recognized as a source of spurious signal in coevolution (20, 24).  
86 Thus, methods that enable the separation of functional coupling from phylogenetic and

87 sampling noise would greatly expand the utility of coevolution, particularly for  
88 applications to diseases involving human proteins with limited numbers of available  
89 sequences.

90

91 Here, we introduce the concept of Nested Coevolution (NC), a correction that leverages  
92 a well-defined null hypothesis to accurately measure the coevolutionary signal above  
93 what is expected from phylogenetic distribution alone. We determined that NC results in  
94 higher fidelity of the coevolutionary signal across gold-standard coevolution-based  
95 metrics for structural prediction for many proteins, especially with fewer sequences. In  
96 addition, we found that NC improves the detection of spatially contiguous groups of  
97 collectively coevolving residues (“sectors”) that are phylogenetically distinct from each  
98 other and the protein itself, beyond differences in entropy alone. Finally, sectors  
99 identified using NC were enriched for positions at which mutations are maximally  
100 deleterious, highlighting the functional significance of signal from our method. Since our  
101 method is agnostic to the underlying method of measuring coevolution, we anticipate  
102 wide utility for the ability to resolve the temporal dimension of protein coevolution.

## 103 Results

104

### 105 *Background model of coevolution reveals temporal dimension of coevolution*

106 To interrogate the contribution of phylogenetic sampling to protein coevolution  
107 measurements, we sought to separate the coevolution signal due to inter-clade and intra-  
108 clade sequence comparisons (Fig. 1A,B). Given a multiple sequence alignment (MSA) for  
109 a protein of interest (Fig. 1Ai), we first measure the total covariation ( $C_T$ ) between every  
110 pair of positions (Fig. 1Aii) using an established metric of residue-residue coupling such  
111 as the normalized mutual information (NMI; Fig. 1A) (20):

$$112 \quad C_T^{ij} = (H_i + H_j - H_{ij})/H_{ij}, \quad (1)$$

113 where  $H_i$  is the Shannon entropy (a measure of conservation) of position  $i$ , and  $H_{ij}$  is the  
114 joint Shannon entropy of positions  $i$  and  $j$ . The quantity  $H_i + H_j - H_{ij}$  is the mutual  
115 information between positions  $i$  and  $j$ , which measures the coupling between residues  
116 (Fig. S1). The NMI residue pair covariation in Eq. 1 is a natural metric choice because  
117 normalizing by  $H_{ij}$  makes the mutual information independent of conservation (20). Note  
118 that our algorithm can be applied to any covariation metric, and as we will show, our  
119 main results are robust to metric choice.

120

121 The most straightforward null hypothesis for protein coevolution is that coevolutionary  
122 coupling between pairs of proteins is completely absent—that is, that the probability of a



123 position having any particular amino acid identity is independent of any other position's  
124 identity. Although this null hypothesis can be evaluated analytically for some methods  
125 (SI), other methods have no known closed-form solution for the expected value of the  
126 coevolution matrix under these conditions. Hence, we computationally compute the  
127 average coevolution signal from many globally resampled MSAs in which each position  
128 in each protein in the original MSA is replaced by the equivalent position from another  
129 randomly chosen protein (resampled with replacement; Fig. 1Av,vi). We expect any  
130 measured coevolution from these resampled matrices to represent signal due simply to  
131 the distribution of amino acid identities at each position; any significant difference  
132 between the coevolution signal measured in the original MSA and this null hypothesis  
133 can potentially be attributed to coevolution.

134  
135 However, this initial null hypothesis does not test for the phylogenetic structure of  
136 sequences; in the globally resampled MSAs, every sequence is effectively evolutionarily  
137 equidistant from one another. Previous attempts to remove the influence of phylogeny  
138 such as APC (Fig. 1Aiii), which corrects the covariation matrix by subtracting the product  
139 of its mean value across columns and rows for each pair of positions (Fig. 1Aiv), have  
140 substantially improved contact prediction (20). However, the APC is a postulated  
141 correction that does not directly take into account the phylogenetic structure of an MSA.  
142 We sought to construct a null hypothesis-driven background model of the expected

143 coevolution in an MSA in which intra-clade coevolution is explicitly removed. We  
144 achieve this goal by generating MSAs by resampling each position from sequences that  
145 are closely related (Fig. 1Av,vi), thus removing correlations arising from recent  
146 evolutionary history within each clade. We define a clade as the subset of sequences  $S$   
147 with a Jukes-Cantor distance below  $d$ , which we refer to as the phylogenetic cutoff. For  
148 each value of  $d$ , we calculate the inter-clade covariation ( $C_{S>d}^{i,j}$ ) from a resampled MSA  
149 either analytically or via bootstrapping (Fig. 1Avii, S2A, Methods), where  $C$  denotes the  
150 chosen covariation measure (e.g. NMI). This inter-clade covariation thus measures the  
151 expected value of covariation due solely to the comparison of sequences between clades  
152 (Fig. 1B). We then average over many such null hypotheses (over many within-clade  
153 resampled MSAs at fixed  $d$ ), yielding the mean inter-clade covariation matrix ( $C_{S>d}$ ) (Fig.  
154 1Aviii), which represents the expected coevolution due to both the distribution of amino  
155 acid identities at each position and the phylogenetic structure of the protein MSA (Fig.  
156 1B). Significant differences between this background model and the baseline signal  
157 measured from the original MSA represent signal that was contained in the intra-clade  
158 comparison of closely related sequences. Since the difference between the background  
159 model and the baseline signal qualitatively captures the significance of the baseline  
160 measurement (Fig S2B, Methods), we subtract  $C_{S>d}$  from the total covariation  $C_T$  to obtain  
161 the phylogenetic cutoff-dependent covariation signal  $C_{S\leq d}$  (Fig. 1Aix); positive values  
162 indicate that the total covariation is larger than expected by comparison of sequences

163 between clades, thus revealing covariation arising from recent evolutionary history in all  
164 clades:

$$165 \quad C_{S \leq d}^{i,j} \equiv C_T^{i,j} - C_{S > d}^{i,j}. \quad (2)$$

166 We refer to the signal  $C_{S \leq d}^{i,j}$  above the null hypothesis  $C_{S > d}^{i,j}$  in Eq. 2 as a protein's "nested  
167 coevolution" (NC), in that it separates coevolution signal into signal attributed to  
168 comparison of sequences either within ( $C_{S \leq d}^{i,j}$ ) or between ( $C_{S > d}^{i,j}$ ) nested clades of a  
169 phylogenetic tree. The only free parameter in the NC is the phylogenetic cutoff ( $d$ ). As  
170 we vary the cutoff value, many patterns of NC typically emerge, revealing distinct  
171 windows of coevolution for a single protein MSA (Fig. 1C). The changes in NC observed  
172 between two cutoffs represent the signal due to pairs of sequences whose distance is  
173 between the cutoffs used to calculate each window. Hence, distinct evolutionary  
174 timescales of protein coevolution are revealed as the phylogenetic cutoff is varied.

175  
176 To test the relevance of NC windows to protein structure prediction, we measured the  
177 enrichment of structural contacts from the pairs of residues with the highest 50 values in  
178 the NC matrix  $C_{S \leq d}^{i,j}$  for each value of  $d$ . Here, we applied NC as a correction to DCA, the  
179 current gold standard for coevolution-based prediction of structural contacts (4, 22). We  
180 employed the direct information (DI) metric to quantify coevolution (4, 22). In this and  
181 subsequent analyses, we considered structural contacts to be within 5 Å at closest  
182 approach, excluding pairs of residues within 5 amino acids on the sequence (Methods).

183 The NC phylogenetic cutoffs revealed a variety of improvements for the KH domain (Fig.  
184 1D), which is present in a wide variety of nucleic acid-binding proteins (25). Some  
185 windows generally outperformed DCA, without (Fig. 1E) or with (Fig. 1F) the APC.

186  
187 To determine the added value of NC for other proteins and for another frequently utilized  
188 coevolution metric, the Frobenius norm (26), which is frequently utilized in DCA as an  
189 alternative to DI (27, 28), we carried out a DCA structural-contact analysis for 10 protein  
190 family domains with DI or Frobenius norm (Methods). Across both metrics and all  
191 proteins, NC improved the predictions of structural contacts (Fig. 2A), even relative to  
192 the inclusion of APC (20). Hence, NC is a correction that enhances the predictive power  
193 of state-of-the-art coevolution measurements.

194

### 195 *NC improves predictions of structural contacts using fewer sequences*

196 One common limitation for computing coevolution is the number of homologous  
197 sequences available for constructing an MSA. To interrogate whether NC could still  
198 accurately predict structural contacts with fewer sequences, we subsampled the MSAs of  
199 10 proteins with different breadth (randomly selecting 10% or 1% of the sequences) or  
200 depth (selecting the 10% or 1% of sequences most related to the protein used to construct  
201 the MSA, Table S1) (Fig. 2B). NC improved structural contact prediction for a majority of  
202 the subsampled MSAs when correcting DI without (Fig. 2C, S4A) or with (Fig. S3B)

203 application of APC. For the KH domain, more than twice as many true positives were  
204 predicted after applying NC compared with DI+APC alone (Fig. S3A). Perhaps  
205 unsurprisingly, breadth sampling generally performed better than depth sampling (Fig.  
206 2C), indicating that accurate prediction is reliant on the sequences being sufficiently  
207 distantly related. Nonetheless, for many proteins, the value of the NC correction was  
208 enhanced when the number of homologous sequences was low, both for depth and  
209 breadth samplings.

210

211 *NC generates eigenvectors with increased fidelity, improving detection of spatially*  
212 *contiguous sets of coevolving residues*

213 Previous studies have utilized coevolution measurements to identify groups of residues  
214 within a protein that are spatially contiguous on the tertiary structure and thus are  
215 postulated to have a joint function (6, 18, 29-32). These “sectors” can be defined by a  
216 variety of methods, such as the extreme-value residues of the eigenvectors of the  
217 coevolution matrix with the largest eigenvalues (18), and have been proposed to reflect  
218 independent biological properties such as catalytic efficiency and thermal stability (18).  
219 Motivated by these successes, we sought to measure the effect of incorporating the  
220 phylogenetic dimension revealed by NC when defining sectors of residues. Specifically,  
221 we measured the NC- and APC-corrected coevolution using NMI across a range of  
222 phylogenetic cutoffs, concatenating the results and performing eigendecomposition to

223 identify the most significant eigenvectors (Methods). The residues most strongly  
224 associated with the positive or negative components of each resulting eigenvector are  
225 considered a sector.

226

227 We first focused on MreB, an essential protein involved in cell-shape determination in  
228 many rod-shaped bacteria (33). MreB belongs to a protein family that includes ParM,  
229 FtsA, and MamK in bacteria, crenactin in archaea, and actin in eukaryotes (34, 35). These  
230 proteins are structural homologs characterized by a four-subdomain fold around an ATP-  
231 binding pocket (35, 36), with very low sequence identity and disparate cellular functions.  
232 Thus, we anticipated that the set of MreB homologs would have sufficient diversity to  
233 support robust coevolution measurements, particularly functional sectors.

234

235 We compared NC-derived sectors with baseline sectors derived from eigenvectors of the  
236 baseline coevolution matrix for MreB homologs. We identified the most closely related  
237 baseline sectors for three NC eigenvectors with some of the highest eigenvalues, which  
238 we refer to as eigenvectors A, B, and C (Methods). Each pair of NC and baseline  
239 eigenvectors appeared similar, especially for the residues with the largest absolute  
240 coefficients (Fig. 3A-C). However, the baseline eigenvectors exhibited much higher  
241 variation of coefficients for residues across the protein (Fig. 3A-C). For eigenvectors A  
242 and B, the NC-derived eigenvectors exhibited 32.8-fold and 38.3-fold lower standard

243 deviation (after removing the 50 highest and lowest coefficients) than the baseline-  
244 derived eigenvectors, respectively (Fig. 3A,B). For eigenvector C, the baseline eigenvector  
245 contained residues with both highly positive and highly negative coefficients, while the  
246 high-magnitude coefficients of the NC eigenvector were solely positive (Fig. 3C); the  
247 positive portion of the NC eigenvector again had substantially lower noise than the  
248 baseline eigenvector (2.1-fold lower standard deviation, Fig. 3C).

249  
250 Motivated by the distinct behaviors of the positive and negative components of  
251 eigenvector C, we defined distinct positive and negative sectors (Methods) for each NC  
252 and baseline eigenvector using a variable cutoff on the site contributions to adjust sector  
253 size (as sectors are defined as the sets of amino acids with highest site contributions in a  
254 given eigenvector). For different sector sizes, we quantified the spatial contiguity as the  
255 mean pairwise distance between each residue within a sector. For sectors A-C (derived  
256 from eigenvectors A-C), the first 5-9 residues exhibited approximately the same spatial  
257 contiguity in the NC as in the baseline eigenvectors (Fig. 3D-F). However, as the cutoff  
258 was increased, the NC sector remained more spatially compact than the baseline sector  
259 (Fig. 3D-F). All three NC sectors were also more spatially contiguous than expected based  
260 on random sampling for cutoffs yielding at least 50 residues (Fig. 3D-F), while the  
261 baseline sector A was distributed across the protein structure (Fig. 3D,J). NC sectors A  
262 and C were largely situated in subdomains IIA (Fig. 3G) and IA (Fig. 3I), respectively,

263 while sector B was localized to the ATP-binding pocket (Fig. 3H). Notably, sector C was  
264 spatially contiguous (Fig. 3I) despite being spread across the protein sequence (Fig. 3C).  
265 Baseline sectors B and C with 15 residues were qualitatively similar to the corresponding  
266 NC sectors (Fig. 3K,L); the large background fluctuations of the baseline eigenvector  
267 likely led to the inclusion of additional, erroneous residues into the sector prediction.  
268 Thus, the phylogenetic correction of NC improves the fidelity of sector detection as  
269 measured by the spatial contiguity of its constituent residues.

270

### 271 *Sectors display distinct phylogenetic signatures from the rest of the protein*

272 Since sectors have been postulated to reflect distinct evolutionary histories driven by  
273 selection for particular biological functions (18), we sought to compare the phylogeny of  
274 the residues within a sector with other sectors and the rest of the protein. The MirrorTree  
275 algorithm (Methods) was originally developed to compare phylogenies of two proteins,  
276 motivated by the assumption that similar histories signifies a common function, e.g.  
277 through protein-protein interactions and/or acting in the same pathway (37, 38). After  
278 computing a pairwise distance matrix of all sequences within an MSA for each of the two  
279 proteins based on homologs in the same set of organisms, the MirrorTree score is defined  
280 as the Pearson correlation coefficient between the entries in the two pairwise distance  
281 matrices (37). We straightforwardly modified the MirrorTree method to compare the



282 complete protein MSA to the MSA filtered to include only the residues within the sector  
283 of interest (Fig. 4A).

284

285 To broadly investigate sector identification, we identified 40 15-residue sectors for MreB  
286 based on the positive and negative coefficients of the 20 eigenvectors with the highest  
287 eigenvalues. As negative controls, we randomly sampled sets of residues of the same size  
288 as each sector from across the protein. Sector-protein MirrorTree scores for sectors A-C  
289 (Fig. 3) were substantially lower for sectors than for the random groups (Fig. 4B), which  
290 all had MirrorTree scores close to 1, as expected (Fig. 4B). Baseline sectors A-C had  
291 MirrorTree scores intermediate between those of the corresponding NC sector and  
292 random groups (Fig. 4B), likely reflecting the noisy selection from baseline eigenvectors  
293 of residues that functionally follow the phylogenetic history of the protein overall. To  
294 evaluate the significance of the MirrorTree score and of the spatial contiguity of each  
295 sector, we computed z-scores based on the mean and standard deviation of the two  
296 metrics applied to the random groups of the same size as each sector. Sectors A-C had  
297 MirrorTree scores  $<0.5$  (Fig. 4B), indicating distinct phylogenetic histories from the  
298 protein, and MirrorTree and spatial contiguity z-scores  $<-2$  (Fig. 4C). There were four  
299 other sectors (D-G) that had spatial contiguity z-scores  $<-2$ . These sectors largely  
300 overlapped with A-C; we will return to this overlap in a later section. All other sectors  
301 had spatial contiguity z-score  $>2$ , and all but five (H-L) had MirrorTree z-score  $>-2$ . Thus,

302 MirrorTree reveals that certain NC sectors have distinct evolutionary trajectories from  
303 the protein itself, motivating us to focus on certain sectors (such as A, B, and C for MreB).

304

### 305 *Phylogenetic similarity and the role of entropy*

306 Conservation itself is a major determinant of protein function (39-41), and spatially  
307 contiguous sets of residues can be identified solely on the basis of conservation (42). To  
308 account for variation in entropy across a protein, previous studies have excluded  
309 positions with high conservation (Shannon entropy $<0.1$ ) or composed of  $>25\%$  gaps in  
310 the MSA (43). For MreB, NC sectors A-C had lower entropy than baseline sectors or  
311 random groups of the same size (Fig. 5A-C), albeit higher entropy than residues typically  
312 considered highly conserved (entropy $<0.1$ ).

313

314 MirrorTree scores of NC sectors were also generally lower than those of baseline sectors  
315 (Fig. 5D-F). To investigate the dependence of sector-protein MirrorTree scores on  
316 entropy, we computed MirrorTree scores for thousands of random groups of the same  
317 size as the sector (15 residues), biasing sampling using a Monte Carlo algorithm to obtain  
318 a wide range of mean entropies; each random group was selected from residues that did  
319 not overlap with the sector. For mean entropy  $\lesssim 1$ , MirrorTree scores were strongly  
320 dependent on entropy (Fig. 5G-I). Thus, the low MirrorTree scores of the NC sectors were  
321 due in part to their low entropy. Nonetheless, the MirrorTree score of NC sector A was

322 significantly lower than those of random groups with the same mean entropy (z-score -  
323 3.5); the entropy of sector B was so low, presumably due to the high conservation of the  
324 ATP-binding pocket (Fig. 3H, S4), that it was challenging to obtain random groups that  
325 were not largely overlapping.

326

327 Since NC sector A displayed the greatest reduction in MirrorTree score relative to  
328 random groups of the same mean entropy, we focused on this sector to investigate the  
329 dependence of the sector-protein MirrorTree score on sector size. As the cutoff was  
330 increased to include more residues, the MirrorTree score increased (Fig. 5D). To  
331 disentangle whether this increase was due directly to the increase in size or to the  
332 inclusion of residues that are more phylogenetically similar to the protein, we compared  
333 the 10-residue version of sector A (Fig. 5G) with randomly selected groups of 10 residues  
334 from 15- and 20-residue versions of sector A, as well as the entire protein. The mean  
335 MirrorTree score increased as the size of the sampling group increased (Fig. 5J), even for  
336 groups with similar entropy as the 10-residue sector (Fig. 5K). Moreover, 15-residue  
337 versions of sectors B and C had similar entropy (Fig. 5B,C); hence, an approach driven by  
338 entropy alone would not have divided these spatially separated clusters. Thus, the  
339 strength of a residue's association in a sector of highly coevolving residues is associated  
340 with more phylogenetic distinction from the rest of the protein than can be explained by  
341 entropy alone.

342

343 *Phylogenetic similarity highlights overlapping sectors*

344 The core residues of some MreB NC eigenvectors sometimes had high coefficients in  
345 multiple eigenvectors (Fig. S5), suggesting that we should consider the union of the  
346 sectors as a functional unit. To rationally identify sectors that should be merged, we again  
347 exploited phylogenetic similarity by calculating MirrorTree correlation coefficients from  
348 comparisons between pairs of sectors (Fig. 6A). MreB NC sectors A-C (Fig. 3) exhibited  
349 low sector-sector MirrorTree scores with each other and with random groups (Fig. 6B),  
350 as expected since they have low sector-protein MirrorTree scores (Fig. 6B). By contrast,  
351 the random groups had MirrorTree scores close to 1 (Fig. 6B). NC sectors were also more  
352 phylogenetically distinct from each other than baseline sectors (Fig. 6C). These data  
353 suggest that the NC sectors were selected by evolutionary pressures that led to distinct  
354 functions.

355

356 Of all sectors that had a MirrorTree z-score or a pairwise distance z-score < -2 (sectors A-  
357 L, Fig. 4C), several pairs had a high sector-sector MirrorTree score. Hierarchical clustering  
358 of the sectors based on their sector-sector MirrorTree profiles led to the identification of  
359 five obvious “mega-sectors” from the sum of the clustered eigenvectors (Methods), which  
360 we denote  $\alpha$ ,  $\beta$ ,  $\gamma$ ,  $\delta$ , and  $\varepsilon$  ( $\alpha$ ,  $\beta$ , and  $\gamma$  contain sectors A, B, and C, respectively) (Fig. 6D).  
361 The mega-sectors exhibited low sector-sector MirrorTree scores (Fig. 6E), and  $\alpha$ ,  $\beta$ , and  $\gamma$

362 had both low sector-protein MirrorTree scores (Fig. 6F, G) and low spatial contiguity z-  
363 scores (Fig. 6G). The 15-residue version of mega-sector  $\alpha$  more compact than the 15-  
364 residue version of A (Fig. 6H), and it contained residues that interact with RodZ (Fig. 6I),  
365 an MreB binding partner that modulates MreB filament nucleation (44) and curvature  
366 (45). Notably, the regions of the 25-residue version of mega-sector  $\alpha$  at the barbed and  
367 pointed ends of the MreB subunit interact with each other in a polymerized MreB  
368 filament (Fig. 6J), reinforcing the spatial contiguity of the mega-sector. Mega-sector  $\beta$  was  
369 identical to sector B, surrounding the ATP-binding pocket (Fig. 6K). As with  $\alpha$  and A, the  
370 15-residue version of mega-sector  $\gamma$  was more compact than the 15-residue version of  
371 sector C (Fig. 6L), indicating that clustering based on MirrorTree scores increases the  
372 spatial contiguity of sectors.

373

#### 374 *NC identifies sectors that are not apparent from the full coevolution matrix*

375 To determine whether our findings about the properties of NC sectors applied to other  
376 proteins, we performed similar sector calculations for enolase (the metalloenzyme  
377 responsible for conversion of 2-phosphoglycerate to phosphoenolpyruvate during  
378 glycolysis (46); Fig. 7A-C), the carbohydrate-processing enzyme glucose-6-phosphate  
379 dehydrogenase (G6PD (47); Fig. 7D-F), and mitogen-activated protein kinase 1 (MAPK1  
380 (48, 49) (Fig. 7G-K). In each case, NC produced sectors with lower background noise and  
381 higher spatial contiguity than baseline sectors.

382

383 Most of the MreB NC eigenvectors had strong signal for either positive or negative  
384 coefficients, but not both (Fig. 3A-C). By contrast, one of the large-eigenvalue NC  
385 eigenvectors for MAPK1 had groups of residues with both very positive and very  
386 negative coefficients (Fig. 7G); these residues were located in distinct regions of the  
387 protein (Fig. 7J,K). As validation for splitting the NC eigenvector into two sectors, the  
388 sector-sector MirrorTree score (0.44) indicated that they are phylogenetically distinct;  
389 moreover, the sector-sector MirrorTree score of the corresponding baseline sectors was  
390 higher (0.71). Thus, NC eigenvectors can be interpreted as two phylogenetically distinct  
391 sectors based on coefficient signs.

392

393 In addition to improving sector predictions by reducing background variation, we were  
394 interested in determining whether NC is able to identify sectors that the full coevolution  
395 matrix misses altogether. For the arginine tRNA ligase ArgS (50) and G6PD, the sector  
396 with the most negative MirrorTree z-score had nearly the lowest spatial contiguity z-  
397 scores (Fig. 7L,M) and no clear counterpart in any of the baseline eigenvectors (Methods).  
398 For ArgS, the NC sector was spatially localized around the arginine binding site (Fig. 7N).  
399 For G6PD, the NC sector was adjacent to one of the two NADPs that bind to the protein  
400 (Fig. 7O). Thus, the NC correction reveals some sectors that are missed by the baseline  
401 method.

402

403 *NC sectors are enriched in damaging mutations*

404 To test the functional significance of NC sectors, we sought experimental datasets with  
405 quantitative measurements of the consequences of mutations across a protein of interest.  
406 Recent studies have pioneered the use of deep mutational scanning to systematically  
407 generate and quantify the phenotypic or fitness effects of a large number of individual  
408 mutations spanning entire domains or protein (29, 51-53), providing new insights into  
409 structure-function relationships. Thus, we asked whether NC sectors were enriched in  
410 residues for which mutation altered protein function and/or fitness.

411

412 The Ras superfamily of membrane-associated small G-proteins is highly conserved and  
413 controls a broad range of cellular processes (54), has inactive and active states that are  
414 regulated by a GTPase-activated protein (55), and has been implicated in cancer (56). A  
415 recent deep mutational scanning study engineered plasmids to express mutant versions  
416 of human H-Ras as well as the Ras-binding domain of human C-Raf (Raf-RBD) in  
417 *Escherichia coli* (57), such that the binding of Ras-GTP to Raf-RBD led to transcription of a  
418 chloramphenicol-resistance cassette. Thus, the binding efficacy of the Ras variant was  
419 directly correlated with cellular growth rate. The effect of Ras mutations on fitness was  
420 quantified by the logarithm of the enrichment of variants in the chloramphenicol-selected  
421 versus the starting population, relative to wild-type. The distribution of fitness effects

422 was centered around zero, although there were some positions with mutations that  
423 displayed significant functional effects (57).

424

425 To determine whether fitness-altering mutants in H-Ras are enriched at positions  
426 identified by coevolution, we identified two high-eigenvalue sectors with obvious  
427 corresponding baseline sectors. As in our previous analyses (Fig. 3A-C, 7A,D,G), aside  
428 from the highly coevolving residues, the NC sectors had much lower noise than the  
429 baseline sectors (Fig. 8A,B). The residues in the two NC sectors were non-overlapping,  
430 and in both cases appeared to be concentrated in regions with low minimum relative  
431 enrichment (Fig. 8C,D). Across cutoffs that defined sectors of various sizes, we computed  
432 the minimum and maximum relative enrichment (representing deactivation and  
433 activation, respectively) over all amino acid mutations for each position in the  
434 NC/baseline sectors as well as for the residues with the lowest entropy, and compared to  
435 the distribution over all residues. As expected, the residues with lowest entropy  
436 consistently predicted significantly more negative minimum relative enrichment than  
437 random sets of residues (Fig. 8E,F). The mean minimum relative enrichment in NC and  
438 baseline versions of sector A was also significantly more negative than random residues,  
439 with the NC sector outperforming the baseline sector and achieving similar enrichment  
440 values to the lowest-entropy residues (Fig. 8E). NC sector B also exhibited mean  
441 minimum relative enrichment significantly lower than random, by contrast to the



442 baseline sector (Fig. 8F). Thus, sectors A and B are more enriched for residues whose  
443 mutation has the most potential for reducing fitness using NC versus baseline. The  
444 maximum relative enrichment was highly similar for sectors and the protein overall (Fig.  
445 S6A,B), suggesting that NC and baseline sectors are enriched for residues with the  
446 potential for deactivating rather than activating mutations in the case of H-Ras. Thus, NC  
447 sectors separate residues based on the maximum impact of mutations at these positions.

## 448 **Discussion**

449

450 Many existing coevolution methods build on correlation or mutual information,  
451 sometimes employing ad-hoc corrections to partially remove the effects of entropy and  
452 phylogeny. Our NC method harnesses phylogenetic distance between sequences as a  
453 novel dimension in the measurement of protein coevolution, in order to increase  
454 understanding of the functional relationships between amino acids in a protein. In  
455 particular, here we demonstrated that coevolution can occur on multiple phylogenetic  
456 timescales within a single protein. While the factors that determine whether pairs of  
457 positions coevolve on short or long timescales are unknown, future studies using NC to  
458 interrogate the specific biochemical functions of protein sectors may reveal general  
459 patterns across diverse proteins. One interpretation of the variable contribution of  
460 coevolution across phylogenetic distance within a single protein (Fig. 1C) is that the  
461 frequency of mutation for coevolving residues within an NC sector is linked to the  
462 timescale of change for the corresponding selective pressure on that sector. For example,  
463 a sector that determines protein thermostability would be predicted to coevolve on a  
464 timescale commensurate with the frequency of changes in environmental temperature,  
465 whether these changes occur over long (e.g. glaciation and interglacial cycles of 100,000  
466 years) or shorter (e.g. Atlantic multidecadal oscillations) timescales.

467

468 Importantly, NC and our repurposed MirrorTree methods are complementary to most  
469 covariation metrics, and hence can enhance existing bioinformatics tools by defining a  
470 phylogenetic dimension of coevolution and allowing focus on functional signal. We  
471 anticipate that our approach will enable application of coevolution-based methods across  
472 a much broader class of proteins, including those for which the set of sequences is limited  
473 in number (Fig. 2) and/or for which the available homologous sequences are biased to a  
474 particular segment of the phylogenetic tree (Fig. 1B). In particular, application to the  
475 growing database of human exome sequences (58) may improve identification of rare  
476 disease-causing mutations. NC may also enhance protein engineering tools by  
477 highlighting targets for directed evolution. As we have demonstrated, NC expands our  
478 ability to detect functional relationships between residues within proteins and to  
479 determine the links between protein evolution and adaptation. In concert with deep  
480 mutational scanning and other comprehensive functional screens (59), NC and  
481 MirrorTree should provide deeper insight into the specific selective pressures under  
482 which proteins have evolved.

483

484 The predominant application of coevolution so far has been structure prediction, from  
485 using top DCA-predicted contacts as constraints (4) to employing DCA model  
486 parameters as input training features for deep neural networks that seek to predict spatial  
487 distances between amino acids (60). Here, we have shown that NC can improve contact

488 prediction by DCA. Moreover, the detection and interpretation of sectors as functional  
489 units within proteins has been a growing research focus, particularly with respect to the  
490 evolutionary origins of sectors. A recent theoretical study demonstrated that selection  
491 acting on a functional property can give rise to a sector (28). Here, we showed that NC  
492 better resolves sectors than baseline by reducing background noise (Fig. 3A-C), leading  
493 to sectors with higher spatial contiguity (Fig. 3D-L) and lower MirrorTree scores (Fig. 4B).  
494 Low MirrorTree scores reveal that residues within sectors have a different evolutionary  
495 history from the rest of the protein, due to both entropy-dependent and entropy-  
496 independent differences (Fig. 5). MirrorTree scores can further be used to evaluate NC  
497 predictions in the absence of a known structure. Motivated by the original design  
498 purpose of MirrorTree, we note that scores between sectors of two proteins could be used  
499 to identify protein-protein interactions—potentially between hosts and microbes—due to  
500 the improved performance of NC when the sampling of sequences is shallow (Fig. 2C).

501  
502 Our observation that NC sectors, and moreover their cores, have high spatial contiguity  
503 and low MirrorTree scores (Fig. 5J) supports the inferred link between coevolution and  
504 spatial contiguity, and suggests that NC can help to guide experiments toward the  
505 residues of highest importance for a sector's function (Fig. 8). Beyond the improvements  
506 from lowering background signal, NC also predicts sectors that are otherwise difficult to  
507 detect (Fig. 7L-O), thus highlighting its value. In addition, some studies have

508 demonstrated other applications such as protein engineering (19) and variant  
509 interpretation (14). Improved detection of functional coevolution could even help to  
510 refine MSA algorithms, which are ultimately a limiting factor in the detection of  
511 coevolution. Our results suggest that the utility of coevolution as a signal for protein  
512 science can be substantially improved by NC, opening new windows for broadly  
513 understanding (and perhaps ultimately engineering) protein structure-function  
514 relationships.

515 **Methods and Materials**

516

517 **MSA construction**

518 MSAs were constructed with BLAST (61) to identify up to 10,000 closest sequences to a  
519 reference sequence, using the RefSeq database (62). Sequences were aligned with Clustal  
520 Omega (63). Sequences with a Jukes-Cantor distance  $>1$  from the reference sequence were  
521 pruned. Redundant sequences and positions with  $>25\%$  gaps were removed. Any  
522 remaining gaps were filled with the closest amino acid from the closest sequence in terms  
523 of Jukes-Cantor distance.

524

525 **Calculation of the expected value of inter-clade covariation**

526 For our analyses, we define a pair of sequences to be within the same clade if the  
527 phylogenetic distance is below a Jukes-Cantor distance  $d$ . The phylogenetic distance is  
528 measured with respect to the aligned protein sequence (Table S1). We sought to measure  
529 the expected value of residue-residue covariation due solely to the comparison of  
530 sequences between clades, which we refer to as the inter-clade covariation  $C_{S>d}$ . Below,  
531 we describe and compare measurement of the expected value of inter-clade covariation  
532 in Eq. 1 of the main text both by approximation via bootstrapping and analytically.

533

534 *Bootstrapping*

535 In this approximate method, we bootstrap the original MSA: for every position, we  
536 replace the amino acid with the identity of the same position from a random sequence in  
537 the same clade. For example, in Fig. 1Avi we show two positions in an MSA, colored by  
538 their clade membership for a given phylogenetic distance  $d$ . Note that the first position is  
539 never a glutamine in the orange clade and is never a threonine in the white clade.  
540 Similarly, the second position is never a serine in the orange clade and is never an  
541 arginine in the white clade. The bootstrapped MSAs resample within clades, so as to not  
542 change the phylogenetic structure of the MSA at distances  $>d$ ; thus, the first position in  
543 the bootstrapped MSAs still does not contain a glutamine, etc. The covariation measured  
544 from each of the bootstrapped MSAs is averaged to obtain the matrix expected under the  
545 hypothesis that there is no coupling between positions within the same clade. The  
546 bootstrapping method can be applied for any coevolution heuristic.

547

#### 548 *Analytical method*

549 To derive an analytical solution in place of bootstrapping the NMI metric, we rephrased  
550 our aim as calculating the expected value of covariation between two positions under the  
551 assumption that the two positions are independent within a clade.

552

553 Consider the Shannon entropy for position  $i$ :

554

$$H_i = - \sum_{k=1}^{20} p_{i=k} \ln p_{i=k},$$

555 where  $p_{i=k}$  is the probability of finding amino acid  $k$  at position  $i$ . The marginal  
556 probabilities of positions  $i$  and  $j$  taking on a particular value in a bootstrapped MSA do  
557 not change on average. However, the joint entropy, which relies on the joint probability,  
558 will change:

559

$$H_{ij} = - \sum_{k,l=1}^{20} p_{i=k,j=l} \ln p_{i=k,j=l}.$$

560 We seek an expression for the joint entropy that captures the assumption that positions  $i$   
561 and  $j$  are independent within clades. Since the joint probability of independent variables  
562 is the product of the individual probabilities, we are left with calculating the sum of  
563 probabilities from each clade  $c$ , weighted by the number of sequences  $n_c$  in each clade:

564

$$p_{i=k,j=l}^{\text{null}} = \left( \sum_c n_c p_{i=k}^c p_{j=l}^c \right) / \left( \sum_c n_c \right)$$

565 where  $p_{i=k}^c$  is the marginal probability of finding amino acid  $k$  within clade  $c$  at position  
566  $i$ .

567

568 A comparison of the bootstrapped and analytical methods for calculating NC for the  
569 yeast actin protein is shown in Fig. S2.

570

571 *Estimating the statistical significance of nested coevolution*



572 The expectation value of our nested coevolution background model is described above  
573 analytically only for normalized mutual information; other coevolution metrics do not  
574 have a known closed form analytical solution, so we rely on bootstrapping to estimate  
575 the expected value. Bootstrapping offers the additional advantage of providing an  
576 estimate of the statistical significance of the observed raw coevolution signal by  
577 measuring what fraction of bootstrapped MSAs achieve equal or greater coevolution  
578 values. The accuracy of the significance estimate is limited by the number of bootstrap  
579 measurements, since the maximum resolution is the reciprocal of the number of  
580 bootstraps performed. Using hundreds of bootstraps, we compared significance  
581 estimates with the absolute difference between the total and inter-clade covariation.  
582 These values were highly correlated (Spearman's  $\rho = 0.95$ , Fig. S2B), indicating that either  
583 the bootstrapping or analytical method of computing NC provides a surrogate for the  
584 significance of the observation.

585

### 586 **Structural contact prediction**

587 Real structural contacts were determined by calculating the distance between the alpha  
588 carbons of every pair of residues in the protein based on a crystal structure (Table S1).  
589 All other atoms, including hydrogen atoms, were disregarded. To predict structural  
590 contacts, we used mean-field DCA, and the value of the pseudocount is 0.5, and  
591 sequences closer than 0.3 Hamming distance are reweighted (4, 22).

592

### 593 **Generation of NC sectors**

594 The output of NC is  $n_d$   $p$ -by- $p$  matrices (Fig. 1C), where  $n_d$  is the number of phylogenetic  
595 windows and  $p$  is the number of amino acids in the protein. These  $n_d$  matrices are  
596 concatenated to obtain a supermatrix of dimension  $pn_d$ -by- $p$  (Fig. S7). Principal  
597 component analysis using eigenvalue decomposition or singular value decomposition is  
598 performed on the super matrix (thus avoiding the need to choose one value of the cutoff  
599 distance  $d$ ), with  $pn_d$  observations and  $p$  features. The eigenvectors are ordered highest to  
600 lowest according to their associated eigenvalues. Each eigenvector is of length  $p$ , where  
601 the  $i^{\text{th}}$  coefficient corresponds to the importance of the  $i^{\text{th}}$  amino acid in explaining the  
602 variation in the direction of the respective eigenvector.

603

604 To extract the specific amino acids that are most responsible for explaining the variation  
605 in a particular eigenvector, we identify the positions with the most positive or most  
606 negative coefficients and define these groups of residues as two sectors. Sectors that have  
607  $<4$  amino acids are ignored for downstream analysis.

608

609 NC and baseline sectors were paired if the dot product of the corresponding eigenvector  
610 was  $>0.6$ .

611

## 612 **Calculating the spatial contiguity of a sector**

613 To quantify spatial contiguity, we calculate the mean distance between the alpha carbon  
614 atoms of each pair of residues in the sector in the crystal structure.

615

## 616 **Adaptation of the MirrorTree algorithm**

617 Mirrortree was originally developed to predict protein-protein interactions based on the  
618 similarity of phylogenetic trees (37). In brief, MSAs are calculated using protein  
619 sequences from the same list of organisms for two proteins. For each MSA, the matrix of  
620 pairwise Jukes-Cantor distances is calculated. The MirrorTree score is the Pearson  
621 correlation coefficient of these two distance matrices. A high correlation indicates that the  
622 two proteins have similar phylogenies and thus are likely to have experienced similar  
623 functional selection. We adapted this method to compare the phylogenetic similarity of  
624 protein sectors with the entire protein (Fig. 4A) or other sectors (Fig. 6A). To compute  
625 sector-protein and sector-sector MirrorTree scores, filtered MSAs were created focusing  
626 on the positions of a given sector.

627

628 Biased sampling of random sectors was accomplished via weighting of residues  
629 according to their entropy.

630

## 631 **Calculation of megasectors**

632 Sets of sectors to be merged into megasectors were determined from hierarchical  
633 clustering based on sector-sector MirrorTree scores. Merging was accomplished by  
634 adding the corresponding eigenvectors after multiplying each sector by +1 or -1  
635 corresponding to whether a positive or negative sector, respectively, was being merged.  
636 The summed vector was then analyzed as if it were an eigenvector in order to define  
637 megasectors at various size cutoffs.

638 **Acknowledgments**

639 The authors thank the Huang lab for useful discussions. This work was supported by  
640 Stanford Graduate Fellowships (to A.C. and E.A.), a Gerald J. Lieberman Fellowship (to  
641 A.C.), grant 851173 from the European Research Council under the European Union's  
642 Horizon 2020 research and innovation programme (to A.-F.B.), NSF CAREER Award  
643 MCB-1149328 (to K.C.H.), and the Allen Discovery Center at Stanford on Systems  
644 Modeling of Infection (to K.C.H.). K.C.H. is a Chan Zuckerberg Biohub Investigator.

645 **Figure Legends**

646

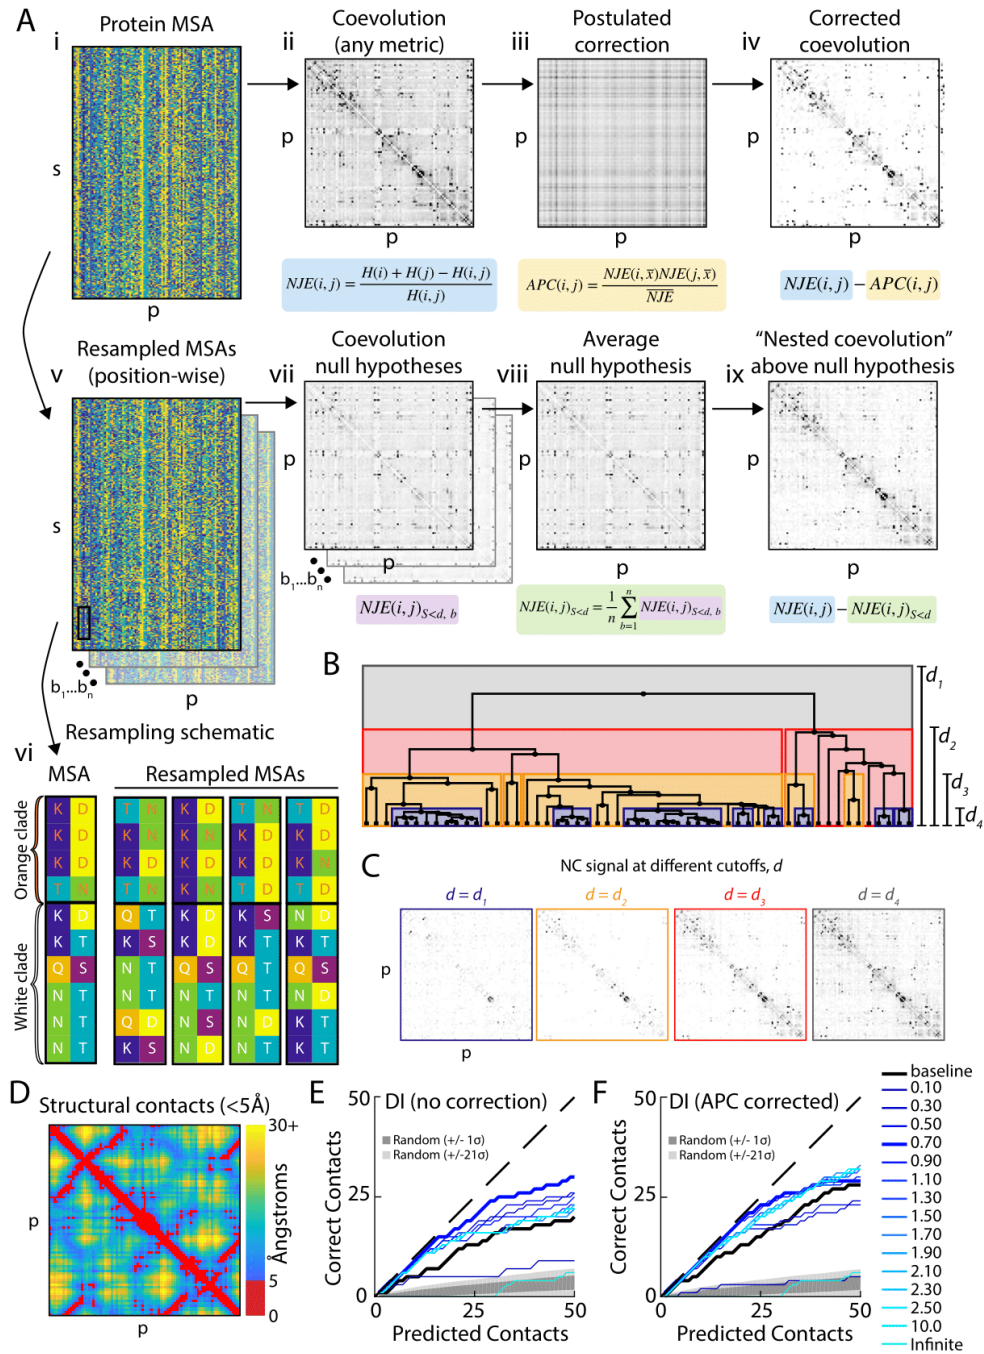

647

648 **Figure 1: NC introduces a phylogenetic dimension to traditional coevolution metrics**

649 **that removes noise and improves structural prediction.**

- 650 A) Schematic illustrating the NC correction to traditional coevolution algorithms. The  
651 MSA (i) is used to generate a covariation matrix (ii) with a particular metric such  
652 as normalized joint entropy or direct information. Previous studies have  
653 attempted to remove phylogenetic noise using the APC (iii), which results in a  
654 corrected coevolution matrix (iv) that has lower levels of off-diagonal signal. For  
655 the NC correction, the MSA is resampled multiple times (v) within clades defined  
656 by a phylogenetic cutoff  $d$  (vi), providing null hypotheses (vii) that are averaged  
657 (viii) to correct the covariation matrix (i). The resulting difference (ix) is the NC  
658 matrix for a particular cutoff  $d$ .
- 659 B) The Jukes-Cantor phylogenetic distance between homologs defines clades  
660 (visualized as a tree) within the NC cutoff  $d$ .
- 661 C) NC signal at different cutoffs  $d$  as illustrated in (B) for the MSA of the KH domain  
662 from (B). For small values of  $d$ , the NC matrix exhibits very little off-diagonal  
663 signal, signifying a reduction in noise.
- 664 D) The structural contact map for KH, highlighting contacts that are in close 3D  
665 proximity ( $<5 \text{ \AA}$ , red), respectively.
- 666 E,F) NC with particular cutoffs  $d$  improves the prediction of structural contacts  
667 relative to DCA, applied to DI without (E) or after correction with APC (F) (black  
668 lines). All residues within five positions on the polypeptide sequence were

669 excluded from the analysis. Gray represents the predictions of the baseline NMI

670 metric.



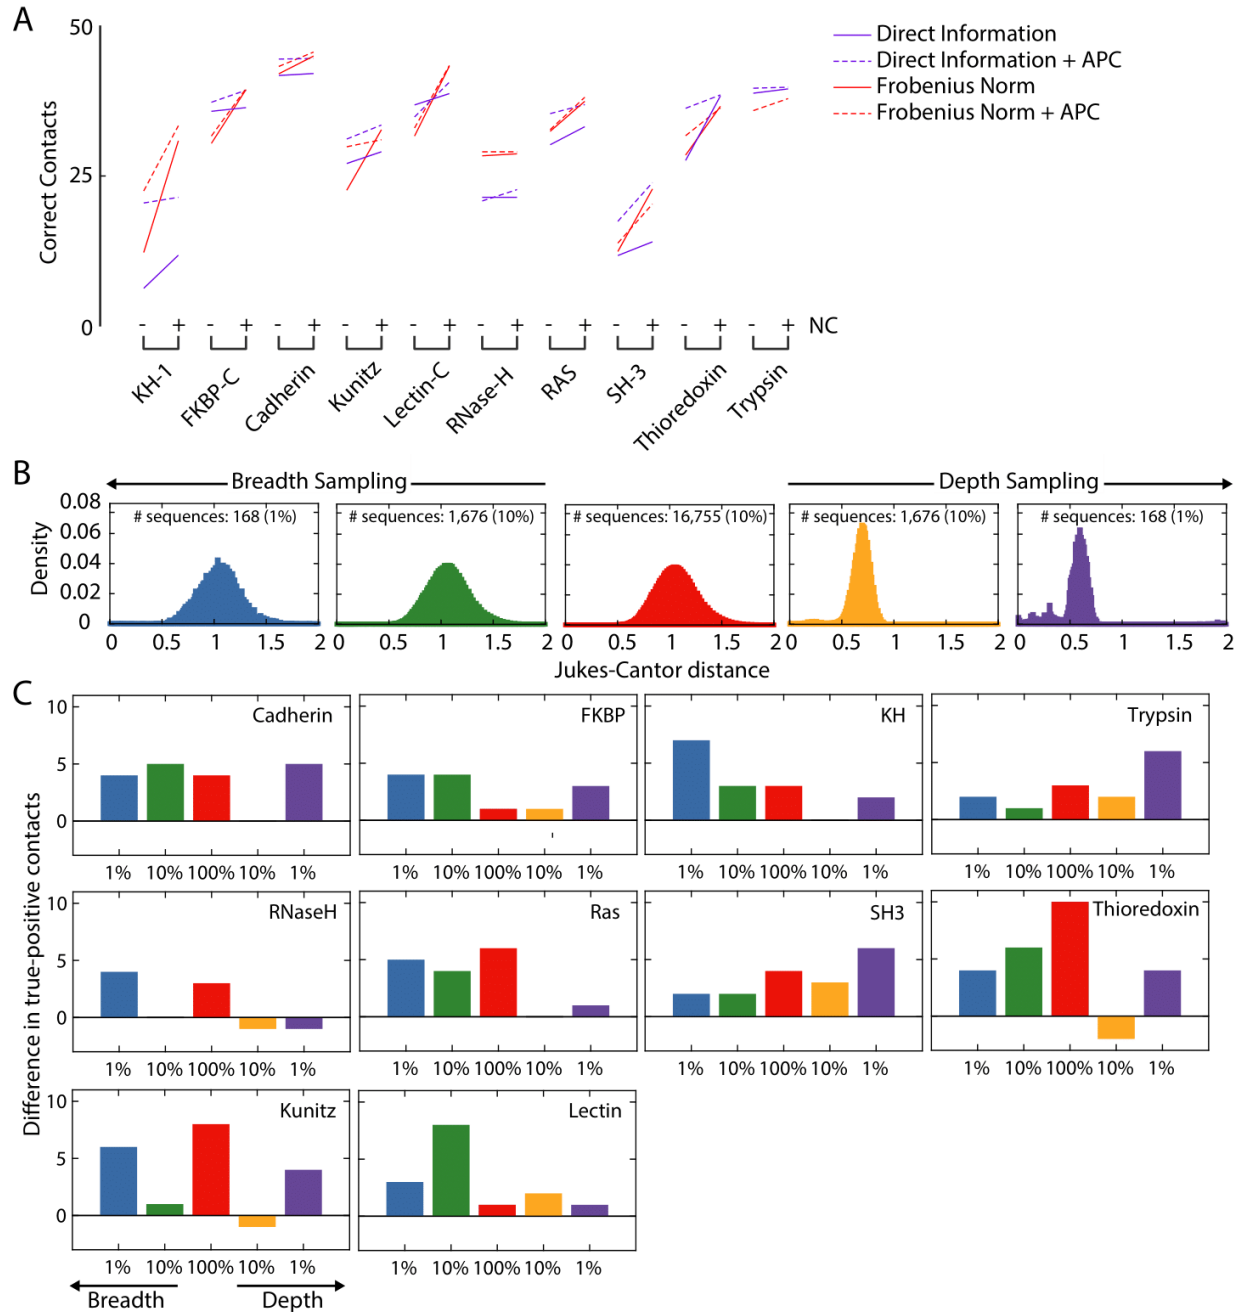

671

672 **Figure 2: NC improves predictions of structural contacts across proteins and**

673 **coevolution methods, and resolves information loss due to subsampling of the set of**

674 **sequences.**

- 675 A) NC increased the number of true-positive structural contacts among the first 50  
676 predictions for 10 highly conserved proteins predicted by DCA using DI or  
677 Frobenius norm, without or with APC.
- 678 B) MSAs were subsampled across breadth (random sampling) and depth (sorted  
679 sampling) of the MSA. Typically, the distribution of Jukes-Cantor distances in the  
680 MSA (red) remained essentially unchanged for breadth sampling (green and blue),  
681 while it shifted to lower values (as expected) for depth sampling (gold and purple);  
682 shown is the KH domain.
- 683 C) NC generally increased the number of true-positive structural contacts among the  
684 first 50 predictions relative to DCA employing DI (without APC) across proteins  
685 and both breadth and depth sampling (for DI with APC, see Fig. S3). Small  
686 decreases occurred for depth sampling of RNase H, thioredoxin, and Kunitz.

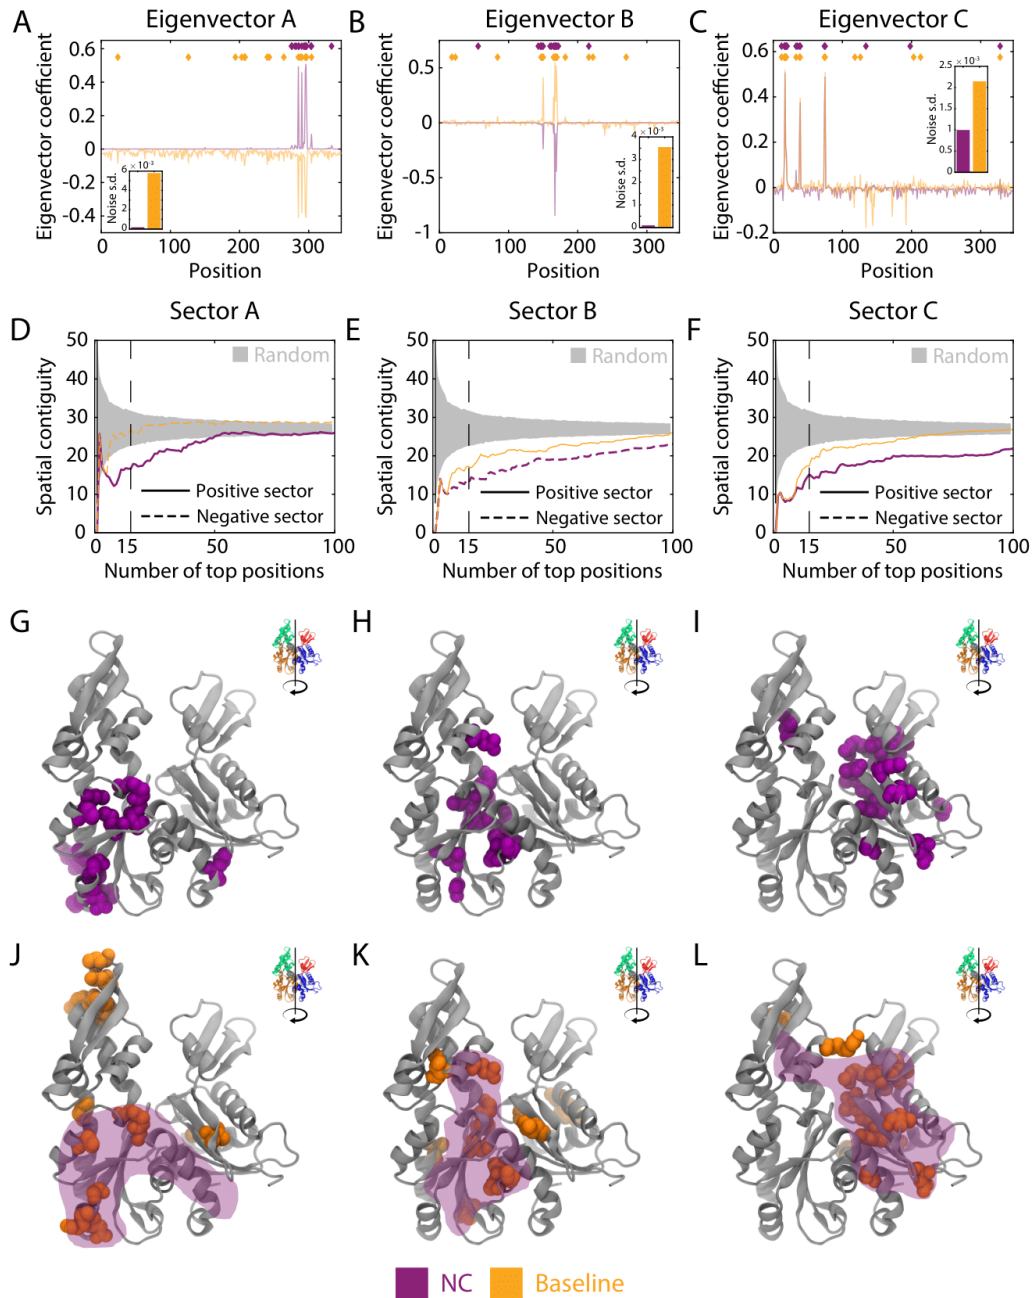

687

688 **Figure 3: NC eigenvectors for the actin homolog MreB have lower noise and are more**

689 **spatially contiguous than baseline eigenvectors.**

690 A-C) Three eigenvectors with large eigenvalues were identified and paired between

691 baseline coevolution (NMI with APC) and the NC correction for an MSA

692 containing 9,998 sequences of MreB. Aside from the residues with large  
693 coefficients, the NC eigenvectors exhibited lower background noise than the  
694 baseline eigenvectors. Insets: standard deviations of the eigenvector coefficients  
695 after excluding the highest and lowest 50 values.

696 D-F) NC sectors are more spatially contiguous than the corresponding baseline  
697 sectors. Sectors were defined based on a sliding cutoff of the most positive or most  
698 negative coefficients of each eigenvector in (A-C). Spatial contiguity was defined  
699 as the mean pairwise distance between each residue within a sector.

700 G-L) For the 15-residue versions of the NC and baseline sectors (vertical lines in (D-  
701 F)), the NC sectors (G-I) are more compact on the three-dimensional structure than  
702 the corresponding baseline sectors (J-L). The shaded purple regions in (J-L)  
703 represent the NC sector.

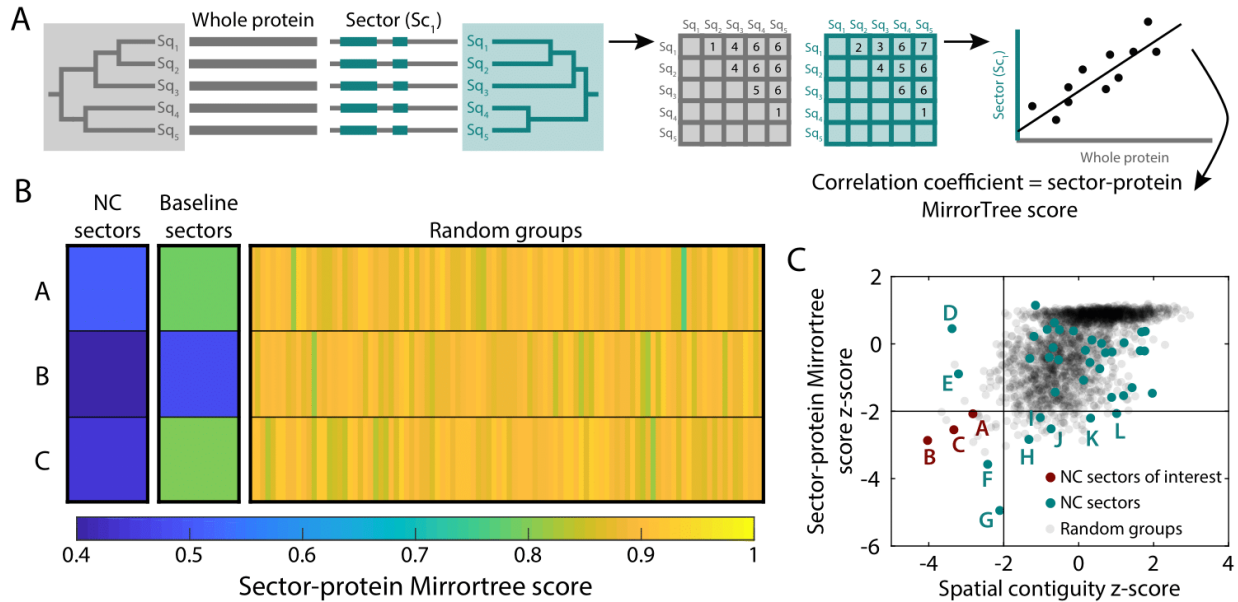

704

705 **Figure 4: Sectors are phylogenetically distinct from the entire protein.**

706 A) Repurposing the MirrorTree algorithm (37) to measure the phylogenetic similarity  
707 between sectors and the entire protein. The MirrorTree score is defined as the  
708 Pearson correlation coefficient between the entries in the two pairwise distance  
709 matrices of all sequences within an MSA for the protein versus only the residues  
710 in the sector.

711 B) MreB NC sectors A-C (Fig. 3) had lower sector-protein MirrorTree scores than the  
712 corresponding baseline sectors, while random groups of 15 residues had  
713 MirrorTree scores close to 1 (as expected).

714 C) MreB NC sectors were computed from the 15 most positive or negative coefficients  
715 of the 20 eigenvectors with the highest eigenvalues. Among these 40 sectors, the z-

716 scores of the MirrorTree score and the spatial contiguity were  $<-2$  for sectors A-C.

717 Sectors D-L substantially overlapped sectors A-C, and are considered in Fig. 6.

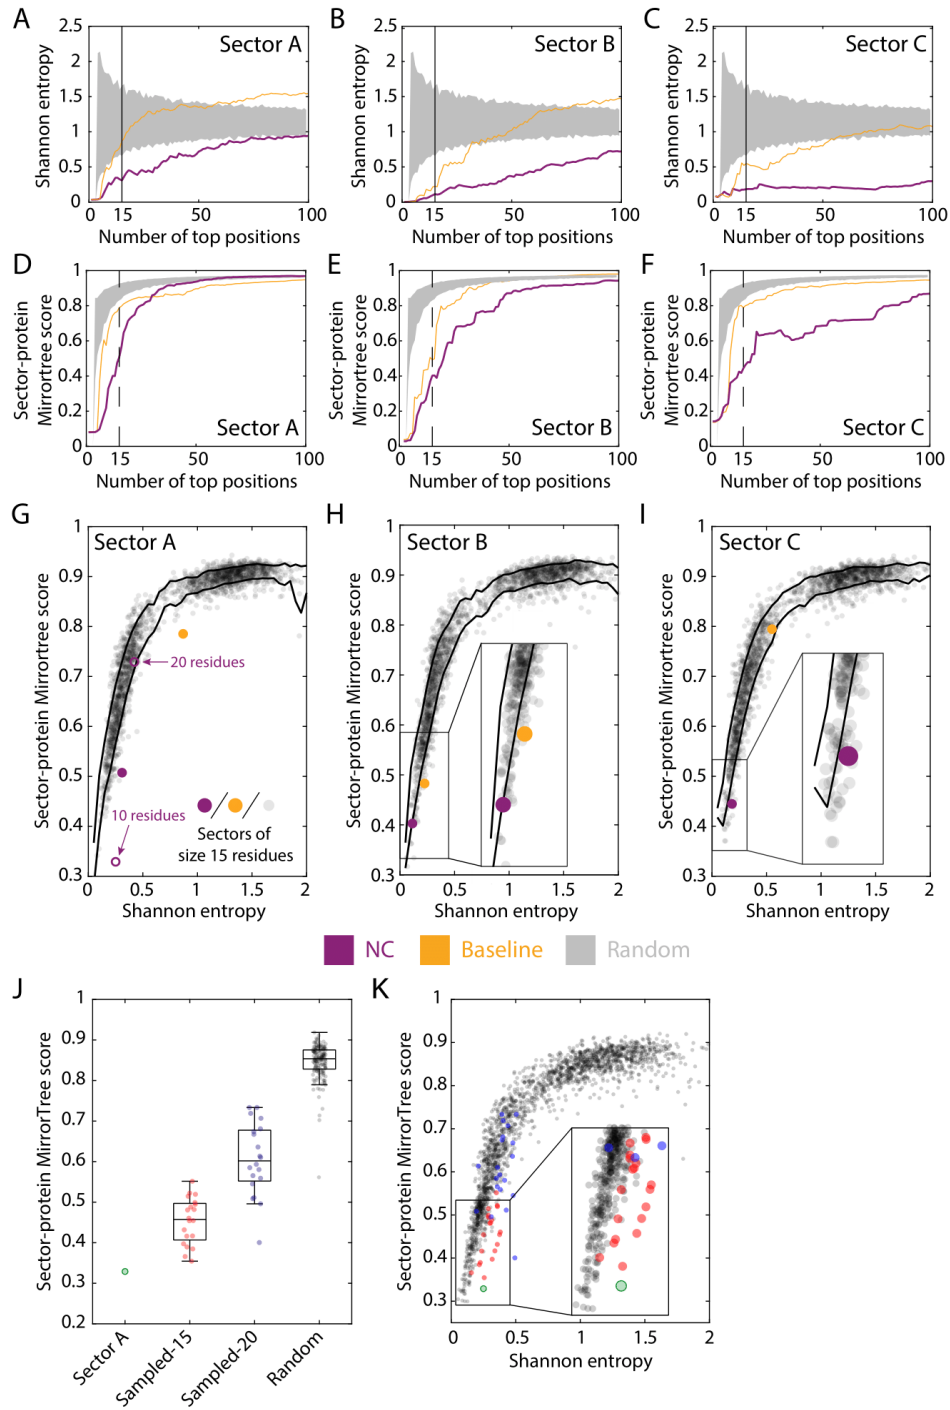

718

719 **Figure 5: Sector-protein MirrorTree scores of residue groups are correlated with**  
720 **entropy, but NC sectors have lower MirrorTree scores than expected from entropy**  
721 **alone.**

722 A-C) The Shannon entropy of MreB NC sectors A-C (Fig. 3) across size cutoffs is lower  
723 than that of the corresponding baseline sectors, indicating that NC selects more  
724 conserved residues (albeit entropy is still higher than the cutoff of  $<0.1$  for typically  
725 being considered highly conserved). Gray regions represent the entropy of a  
726 randomly selected group of residues of the same size.

727 D-F) MirrorTree scores are lower for the NC sectors than for the corresponding  
728 baseline sectors. Gray regions represent the MirrorTree scores of a randomly  
729 selected group of residues of the same size.

730 G-I) The MirrorTree scores of sectors A-C (filled gold and purple circles) and of  
731 random groups of 15 residues (gray). Although MirrorTree score is linked to  
732 entropy, NC sectors A and C have MirrorTree scores significantly lower than  
733 expected based on entropy alone. In (G), the open purple circles denote the  
734 versions of sector A with 10 and 20 residues. Black curves indicate  $\pm 1$  standard  
735 deviation from the mean MirrorTree score for a given entropy.

736 J) The 10-residue version of NC sector A has lower MirrorTree score than sets of 10  
737 residues selected from the 15- and 20-residue versions of the same sector, which  
738 are lower than those of random groups of 10 residues. The central mark indicates  
739 the median, and the bottom and top edges of the box indicate the 25<sup>th</sup> and 75<sup>th</sup>  
740 percentiles, respectively. The whiskers extend to the most extreme data points not  
741 considered outliers.



742 K) The 10-residue version of NC sector A has a lower MirrorTree score than 10-residue  
743 subsets of the 15- and 20-residue versions of the same sector with similar entropy.  
744 Same data as in (J). Thus, the 10-residue sector represents a “core” of the most  
745 highly coevolving residues.

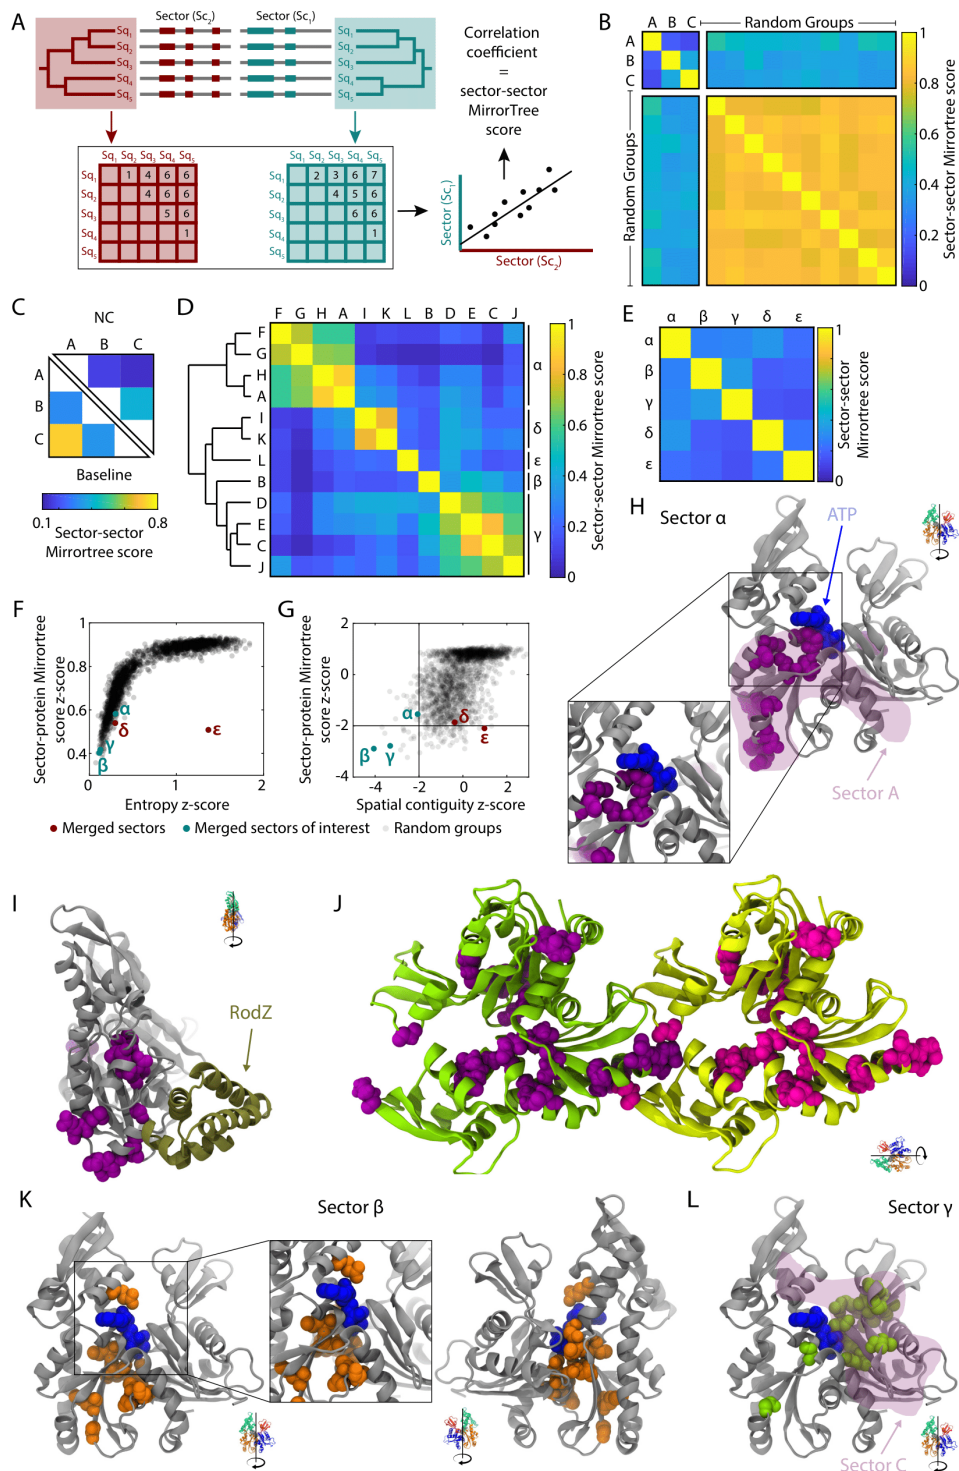

746

747 **Figure 6: MreB NC sectors are generally phylogenetically distinct, and those with**  
 748 **phylogenetic overlap collectively overlap with functionally important regions.**

- 749 A) Repurposing the MirrorTree algorithm to measure the phylogenetic similarity  
750 between sectors.
- 751 B) MreB NC sectors A, B, and C exhibited low sector-sector MirrorTree scores with  
752 each other, but high values with random groups of 15 residues (which also  
753 exhibited high MirrorTree scores with each other).
- 754 C) NC sectors A-C have lower sector-sector MirrorTree scores with each other than  
755 baseline sectors A-C with each other, indicating that they are more  
756 phylogenetically distinct.
- 757 D) Hierarchical clustering of MreB NC sectors A-L (Fig. 4C) based on sector-sector  
758 MirrorTree profiles suggests five distinct mega-sectors.
- 759 E-G) The MreB mega-sectors defined by the sum of the clustered eigenvectors  
760 exhibited low sector-sector MirrorTree scores with each other (E) as well as low  
761 sector-protein MirrorTree scores (F). Mega-sectors  $\alpha$ ,  $\beta$ , and  $\gamma$  (similar to sectors A-  
762 C) exhibited high spatial contiguity ( $z$ -score < -2).
- 763 H,I) Mega-sector  $\alpha$  was more spatially contiguous than sector A (shaded purple  
764 region) (H), and contained residues around the interface with MreB's binding  
765 partner RodZ (I).
- 766 J) The 25-residue version of mega-sector  $\alpha$  connects the pointed and barbed ends of  
767 each subunit in a protofilament.
- 768 K) Mega-sector  $\beta$  (identical to sector B) surrounds the ATP binding pocket.

769 L) Mega-sector  $\gamma$  is more spatially contiguous than sector C (shaded purple region).

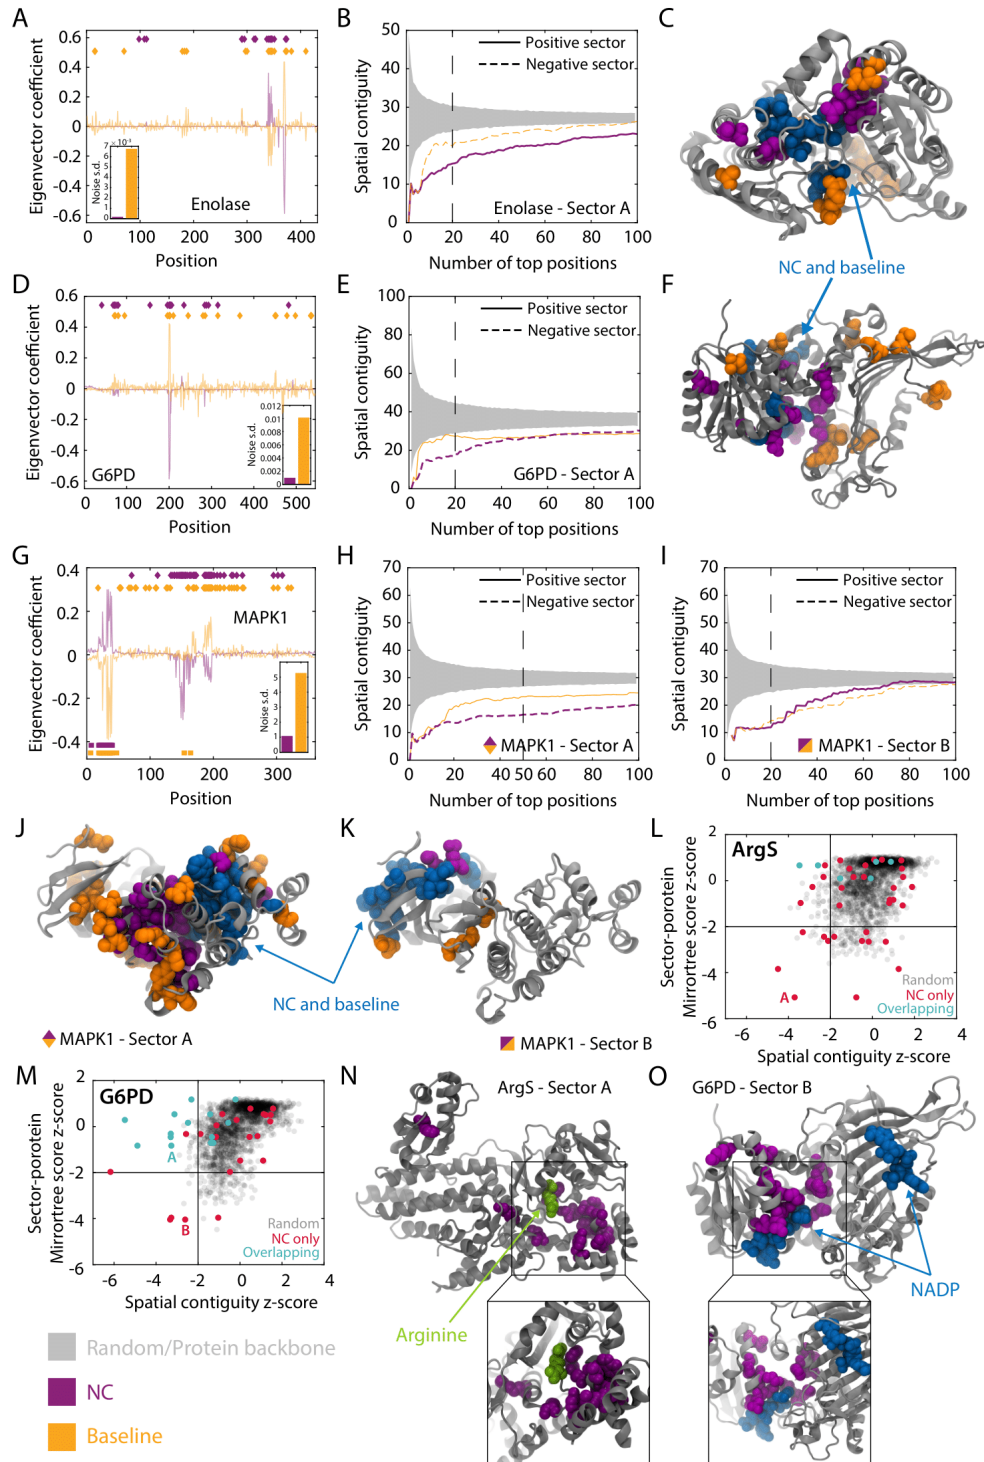

770

771 **Figure 7: NC eigenvectors generally improve sector prediction across proteins, and**

772 **enable identification of sectors that are not detectable using the baseline method.**

773 A,D,G) NC eigenvectors for enolase (A), G6PD (D), and MAPK1 (G) exhibit lower  
774 background noise than the corresponding baseline (NMI with APC)  
775 eigenvectors.

776 B,E,H,I) The appropriate NC sectors (positive or negative values of the eigenvector)  
777 associated with the eigenvectors in (A,D,G) are more spatially contiguous across  
778 size cutoffs than the baseline sectors. Note that the MAPK1 eigenvector was split  
779 into a positive sector (H) and a negative sector (I).

780 C,F) The 15-residue versions of the sectors in (B,E) on the crystal structures of enolase  
781 (C) and G6PD (F) illustrate the more compact nature of the NC sectors as  
782 compared with the baseline sectors.

783 J,K) The 50- and 20-residue versions of the NC sectors in (H,I) are more spatially  
784 compact on the structure than the corresponding baseline sectors, and occupy  
785 distinct parts of the protein.

786 L-O) For ArgS (L) and G6PD (M), certain high-eigenvalue NC sectors had no  
787 obvious baseline counterpart. These NC sectors had low MirrorTree and spatial  
788 contiguity z-scores (L,M), and 15-residue versions occupied spatially compact  
789 regions around ligands (arginine in (N), NADP in (O)) on the structure (N,O).  
790 Thus, NC enables the detection of sectors that are otherwise hidden.

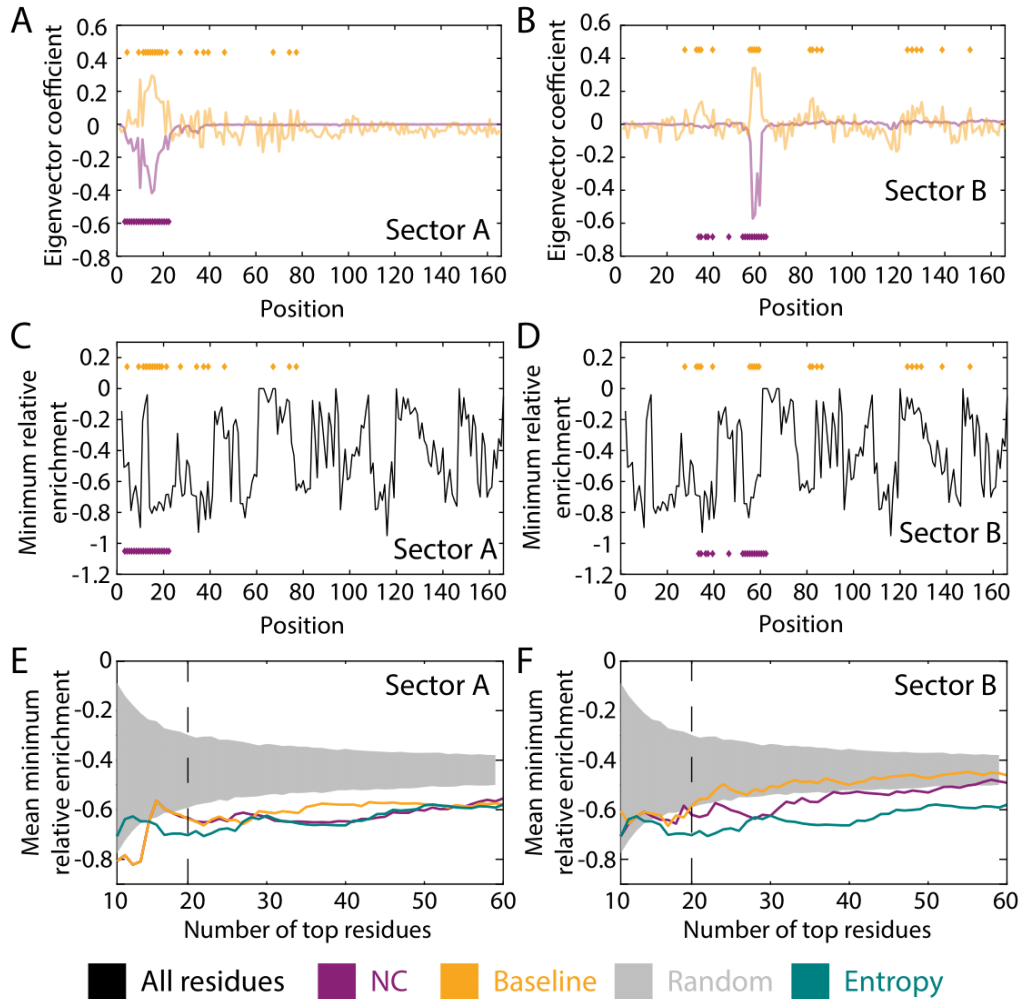

791

792 **Figure 8: NC sectors predict deactivating mutations in H-Ras.**

793 A,B) NC predicts two eigenvectors with much lower background noise than the  
794 baseline counterparts. The purple and gold diamonds represent the locations of  
795 residues in sectors of size 20.

796 C,D) Fitness data from a screen of binding efficacy of H-Ras to Raf-RBD (57). Shown  
797 is the minimum enrichment over all mutations at each position (thus  
798 representing maximum deactivation). The purple and gold diamonds represent  
799 the locations of residues in sectors of size 20.

800 E,F) Across most sector size cutoffs, the mean minimum relative enrichment was  
801 significantly lower than random (gray) for NC sectors A and B and comparable  
802 that of the residues with the lowest entropy (teal). NC sectors also outperformed  
803 their baseline counterparts.



850 **References**

851

852 1. M. Hollstein, B. Sidransky, B. Vogelstein, C. C. Harris, P53 Mutations in Human  
853 Cancers. *Science* **253**, 49-53 (1991).

854 2. M. J. Zvelebil, G. J. Barton, W. R. Taylor, M. J. E. Sternberg, Prediction of protein  
855 secondary structure and active sites using the alignment of homologous  
856 sequences. *Journal of Molecular Biology* **195**, 957-961 (1987).

857 3. R. S. Dwyer, D. P. Ricci, L. J. Colwell, T. J. Silhavy, N. S. Wingreen, Predicting  
858 functionally informative mutations in Escherichia coli BamA using evolutionary  
859 covariance analysis. *Genetics* **195**, 443-455 (2013).

860 4. D. S. Marks, L. J. Colwell, R. Sheridan, T. A. Hopf, A. Pagnani, R. Zecchina, C.  
861 Sander, Protein 3D structure computed from evolutionary sequence variation.  
862 *PLoS ONE* **6** (2011).

863 5. F. Morcos, B. Jana, T. Hwa, J. N. Onuchic, Coevolutionary signals across protein  
864 lineages help capture multiple protein conformations. *Proceedings of the National*  
865 *Academy of Sciences of the United States of America* **110**, 20533-20538 (2013).

866 6. K. a. Reynolds, R. N. McLaughlin, R. Ranganathan, Hot spots for allosteric  
867 regulation on protein surfaces. *Cell* **147**, 1564-1575 (2011).

- 868 7. M. Weigt, R. A. White, H. Szurmant, J. A. Hoch, T. Hwa, Identification of direct  
869 residue contacts in protein-protein interaction by message passing. *Proc Natl*  
870 *Acad Sci U S A* **106**, 67-72 (2009).
- 871 8. A. F. Bitbol, Inferring interaction partners from protein sequences using mutual  
872 information. *PLoS Comput Biol* **14**, e1006401 (2018).
- 873 9. A. F. Bitbol, R. S. Dwyer, L. J. Colwell, N. S. Wingreen, Inferring interaction  
874 partners from protein sequences. *Proc Natl Acad Sci U S A* **113**, 12180-12185  
875 (2016).
- 876 10. L. Burger, E. van Nimwegen, Accurate prediction of protein-protein interactions  
877 from sequence alignments using a Bayesian method. *Mol Syst Biol* **4**, 165 (2008).
- 878 11. T. Gueudre, C. Baldassi, M. Zamparo, M. Weigt, A. Pagnani, Simultaneous  
879 identification of specifically interacting paralogs and interprotein contacts by  
880 direct coupling analysis. *Proc Natl Acad Sci U S A* **113**, 12186-12191 (2016).
- 881 12. S. Ovchinnikov, H. Kamisetty, D. Baker, Robust and accurate prediction of  
882 residue-residue interactions across protein interfaces using evolutionary  
883 information. *eLife* (2014).
- 884 13. O. Rivoire, Parsimonious evolutionary scenario for the origin of allostery and  
885 coevolution patterns in proteins. *Phys Rev E* **100**, 032411 (2019).

- 886 14. T. A. Hopf, J. B. Ingraham, F. J. Poelwijk, C. P. Scharfe, M. Springer, C. Sander, D.  
887 S. Marks, Mutation effects predicted from sequence co-variation. *Nat Biotechnol*  
888 **35**, 128-135 (2017).
- 889 15. D. Altschuh, T. Vernet, D. Moras, K. Nagai, Coordinated amino acid changes in  
890 homologous protein families. *Protein Engineering* **2**, 193-199 (1988).
- 891 16. W. Atchley, K. Wollenberg, W. Fitch, W. Terhalle, A. Dress, Correlations among  
892 amino acid sites in bHLH protein domains: an information theoretic analysis.  
893 164-178 (2000).
- 894 17. U. Göbel, C. Sander, R. Schneider, a. Valencia, Correlated mutations and residue  
895 contacts in proteins. *Proteins* **18**, 309-317 (1994).
- 896 18. N. Halabi, O. Rivoire, S. Leibler, R. Ranganathan, Protein sectors: evolutionary  
897 units of three-dimensional structure. *Cell* **138**, 774-786 (2009).
- 898 19. J. M. Skerker, B. S. Perchuk, A. Siryaporn, E. a. Lubin, O. Ashenberg, M. Goulian,  
899 M. T. Laub, Rewiring the Specificity of Two-Component Signal Transduction  
900 Systems. *Cell* **133**, 1043-1054 (2008).
- 901 20. S. D. Dunn, L. M. Wahl, G. B. Gloor, Mutual information without the influence of  
902 phylogeny or entropy dramatically improves residue contact prediction.  
903 *Bioinformatics (Oxford, England)* **24**, 333-340 (2008).

- 904 21. M. Socolich, S. W. Lockless, W. P. Russ, H. Lee, K. H. Gardner, R. Ranganathan,  
905 Evolutionary information for specifying a protein fold. *Nature* **437**, 512-518  
906 (2005).
- 907 22. F. Morcos, A. Pagnani, B. Lunt, A. Bertolino, D. S. Marks, C. Sander, R. Zecchina,  
908 J. N. Onuchic, T. Hwa, M. Weigt, Direct-coupling analysis of residue coevolution  
909 captures native contacts across many protein families. *Proc Natl Acad Sci U S A*  
910 **108**, E1293-1301 (2011).
- 911 23. L. C. Martin, G. B. Gloor, S. D. Dunn, L. M. Wahl, Using information theory to  
912 search for co-evolving residues in proteins. *Bioinformatics* **21**, 4116-4124 (2005).
- 913 24. K. R. Wollenberg, W. R. Atchley, Separation of phylogenetic and functional  
914 associations in biological sequences by using the parametric bootstrap. *Proc Natl*  
915 *Acad Sci U S A* **97**, 3288-3291 (2000).
- 916 25. M. F. Garcia-Mayoral, D. Hollingworth, L. Masino, I. Diaz-Moreno, G. Kelly, R.  
917 Gherzi, C. F. Chou, C. Y. Chen, A. Ramos, The structure of the C-terminal KH  
918 domains of KSRP reveals a noncanonical motif important for mRNA  
919 degradation. *Structure* **15**, 485-498 (2007).
- 920 26. G. H. Golub, C. F. Van Loan, *Matrix computations*, Johns Hopkins studies in the  
921 mathematical sciences (Johns Hopkins University Press, Baltimore, ed. 3rd, 1996),  
922 pp. xxvii, 694 p.

- 923 27. M. Ekeberg, C. Lovkvist, Y. Lan, M. Weigt, E. Aurell, Improved contact  
924 prediction in proteins: using pseudolikelihoods to infer Potts models. *Phys Rev E*  
925 *Stat Nonlin Soft Matter Phys* **87**, 012707 (2013).
- 926 28. S. W. Wang, A. F. Bitbol, N. S. Wingreen, Revealing evolutionary constraints on  
927 proteins through sequence analysis. *PLoS Comput Biol* **15**, e1007010 (2019).
- 928 29. R. N. McLaughlin, Jr., F. J. Poelwijk, A. Raman, W. S. Gosal, R. Ranganathan, The  
929 spatial architecture of protein function and adaptation. *Nature* **491**, 138-142  
930 (2012).
- 931 30. M. Novinec, M. Korenc, A. Caflisch, R. Ranganathan, B. Lenarcic, A. Baici, A  
932 novel allosteric mechanism in the cysteine peptidase cathepsin K discovered by  
933 computational methods. *Nat Commun* **5**, 3287 (2014).
- 934 31. O. Rivoire, K. A. Reynolds, R. Ranganathan, Evolution-Based Functional  
935 Decomposition of Proteins. *PLoS Comput Biol* **12**, e1004817 (2016).
- 936 32. R. G. Smock, O. Rivoire, W. P. Russ, J. F. Swain, S. Leibler, R. Ranganathan, L. M.  
937 Gierasch, An interdomain sector mediating allostery in Hsp70 molecular  
938 chaperones. *Mol Syst Biol* **6**, 414 (2010).
- 939 33. H. Shi, B. P. Bratton, Z. Gitai, K. C. Huang, How to Build a Bacterial Cell: MreB  
940 as the Foreman of E. coli Construction. *Cell* **172**, 1294-1305 (2018).

- 941 34. T. Izore, R. Duman, D. Kureisaite-Ciziene, J. Lowe, Crenactin from *Pyrobaculum*  
942 *calidifontis* is closely related to actin in structure and forms steep helical  
943 filaments. *FEBS Lett* **588**, 776-782 (2014).
- 944 35. F. van den Ent, L. A. Amos, J. Lowe, Prokaryotic origin of the actin cytoskeleton.  
945 *Nature* **413**, 39-44 (2001).
- 946 36. F. van den Ent, L. Amos, J. Lowe, Bacterial ancestry of actin and tubulin. *Curr*  
947 *Opin Microbiol* **4**, 634-638 (2001).
- 948 37. R. A. Craig, L. Liao, Phylogenetic tree information aids supervised learning for  
949 predicting protein-protein interaction based on distance matrices. *BMC*  
950 *Bioinformatics* **8**, 6 (2007).
- 951 38. F. Pazos, A. Valencia, Similarity of phylogenetic trees as indicator of protein-  
952 protein interaction. *Protein Eng* **14**, 609-614 (2001).
- 953 39. C. L. Araya, C. Cenik, J. A. Reuter, G. Kiss, V. S. Pande, M. P. Snyder, W. J.  
954 Greenleaf, Identification of significantly mutated regions across cancer types  
955 highlights a rich landscape of functional molecular alterations. *Nat Genet* **48**, 117-  
956 125 (2016).
- 957 40. Z. Hu, B. Ma, H. Wolfson, R. Nussinov, Conservation of polar residues as hot  
958 spots at protein interfaces. *Proteins* **39**, 331-342 (2000).
- 959 41. O. B. Ptitsyn, Protein folding and protein evolution: common folding nucleus in  
960 different subfamilies of c-type cytochromes? *J Mol Biol* **278**, 655-666 (1998).

- 961 42. T. Teşileanu, L. J. Colwell, S. Leibler, Protein Sectors: Statistical Coupling  
962 Analysis versus Conservation. *PLOS Computational Biology* **11**, e1004091 (2015).
- 963 43. I. Anishchenko, S. Ovchinnikov, H. Kamisetty, D. Baker, Origins of coevolution  
964 between residues distant in protein 3D structures. *Proc Natl Acad Sci U S A* **114**,  
965 9122-9127 (2017).
- 966 44. B. P. Bratton, J. W. Shaevitz, Z. Gitai, R. M. Morgenstein, MreB polymers and  
967 curvature localization are enhanced by RodZ and predict E. coli's cylindrical  
968 uniformity. *Nat Commun* **9**, 2797 (2018).
- 969 45. A. Colavin, H. Shi, K. C. Huang, RodZ modulates geometric localization of the  
970 bacterial actin MreB to regulate cell shape. *Nat Commun* **9**, 1280 (2018).
- 971 46. T. G. Spring, F. Wold, The purification and characterization of Escherichia coli  
972 enolase. *J Biol Chem* **246**, 6797-6802 (1971).
- 973 47. D. N. Wright, W. R. Lockhart, Effects of Growth Rate and Limiting Substrate on  
974 Glucose Metabolism in Escherichia Coli. *J Bacteriol* **89**, 1082-1085 (1965).
- 975 48. S. L. Pelech, J. S. Sanghera, M. Daya-Makin, Protein kinase cascades in meiotic  
976 and mitotic cell cycle control. *Biochem Cell Biol* **68**, 1297-1330 (1990).
- 977 49. T. W. Sturgill, J. Wu, Recent progress in characterization of protein kinase  
978 cascades for phosphorylation of ribosomal protein S6. *Biochim Biophys Acta* **1092**,  
979 350-357 (1991).

- 980 50. I. N. Hirshfield, H. P. Bloemers, The biochemical characterization of two mutant  
981 arginyl transfer ribonucleic acid synthetases from Escherichia coli K-12. *J Biol*  
982 *Chem* **244**, 2911-2916 (1969).
- 983 51. S. L. Dove, J. K. Joung, A. Hochschild, Activation of prokaryotic transcription  
984 through arbitrary protein-protein contacts. *Nature* **386**, 627-630 (1997).
- 985 52. J. K. Joung, E. I. Ramm, C. O. Pabo, A bacterial two-hybrid selection system for  
986 studying protein-DNA and protein-protein interactions. *Proc Natl Acad Sci U S A*  
987 **97**, 7382-7387 (2000).
- 988 53. W. A. Lim, R. T. Sauer, Alternative packing arrangements in the hydrophobic  
989 core of lambda repressor. *Nature* **339**, 31-36 (1989).
- 990 54. C. W. Johnson, D. Reid, J. A. Parker, S. Salter, R. Knihtila, P. Kuzmic, C. Mattos,  
991 The small GTPases K-Ras, N-Ras, and H-Ras have distinct biochemical properties  
992 determined by allosteric effects. *J Biol Chem* **292**, 12981-12993 (2017).
- 993 55. C. Wellbrock, M. Karasarides, R. Marais, The RAF proteins take centre stage. *Nat*  
994 *Rev Mol Cell Biol* **5**, 875-885 (2004).
- 995 56. I. A. Prior, P. D. Lewis, C. Mattos, A comprehensive survey of Ras mutations in  
996 cancer. *Cancer Res* **72**, 2457-2467 (2012).
- 997 57. P. Bandaru, N. H. Shah, M. Bhattacharyya, J. P. Barton, Y. Kondo, J. C. Cofsky, C.  
998 L. Gee, A. K. Chakraborty, T. Kortemme, R. Ranganathan, J. Kuriyan,



- 999 Deconstruction of the Ras switching cycle through saturation mutagenesis. *Elife* 6  
1000 (2017).
- 1001 58. R. Do *et al.*, Exome sequencing identifies rare LDLR and APOA5 alleles  
1002 conferring risk for myocardial infarction. *Nature* **518**, 102-106 (2015).
- 1003 59. H. Q. Nguyen, J. Roy, B. Harink, N. P. Damle, N. R. Latorraca, B. C. Baxter, K.  
1004 Brower, S. A. Longwell, T. Kortemme, K. S. Thorn, M. S. Cyert, P. M. Fordyce,  
1005 Quantitative mapping of protein-peptide affinity landscapes using spectrally  
1006 encoded beads. *Elife* **8** (2019).
- 1007 60. A. W. Senior, R. Evans, J. Jumper, J. Kirkpatrick, L. Sifre, T. Green, C. Qin, A.  
1008 Zidek, A. W. R. Nelson, A. Bridgland, H. Penedones, S. Petersen, K. Simonyan, S.  
1009 Crossan, P. Kohli, D. T. Jones, D. Silver, K. Kavukcuoglu, D. Hassabis, Improved  
1010 protein structure prediction using potentials from deep learning. *Nature* **577**, 706-  
1011 710 (2020).
- 1012 61. T. Madden, The BLAST Sequence Analysis Tool. 2002 Oct 9 [Updated 2003 Aug  
1013 13]. *The NCBI Handbook [Internet]. Bethesda (MD): National Center for Biotechnology*  
1014 *Information (US)* (2002).
- 1015 62. T. Tatusova, S. Ciufu, B. Fedorov, K. O'Neill, I. Tolstoy, RefSeq microbial  
1016 genomes database: new representation and annotation strategy. *Nucleic Acids Res*  
1017 **42**, D553-559 (2014).

- 1018 63. F. Sievers, A. Wilm, D. Dineen, T. J. Gibson, K. Karplus, W. Li, R. Lopez, H.  
1019 McWilliam, M. Remmert, J. Soding, J. D. Thompson, D. G. Higgins, Fast, scalable  
1020 generation of high-quality protein multiple sequence alignments using Clustal  
1021 Omega. *Mol Syst Biol* 7, 539 (2011).  
1022
